# Supplementary figures and images for: Determination of biodiesel properties based on a fatty acid profile of eight Amazon cyanobacterial strains grown in two different culture media
Source: Royal Society of Chemistry journal article supplement (doi:10.1039/c6ra23268j), 2016-01-01

Chromatogram of CACIAM3 in ASM1 medium

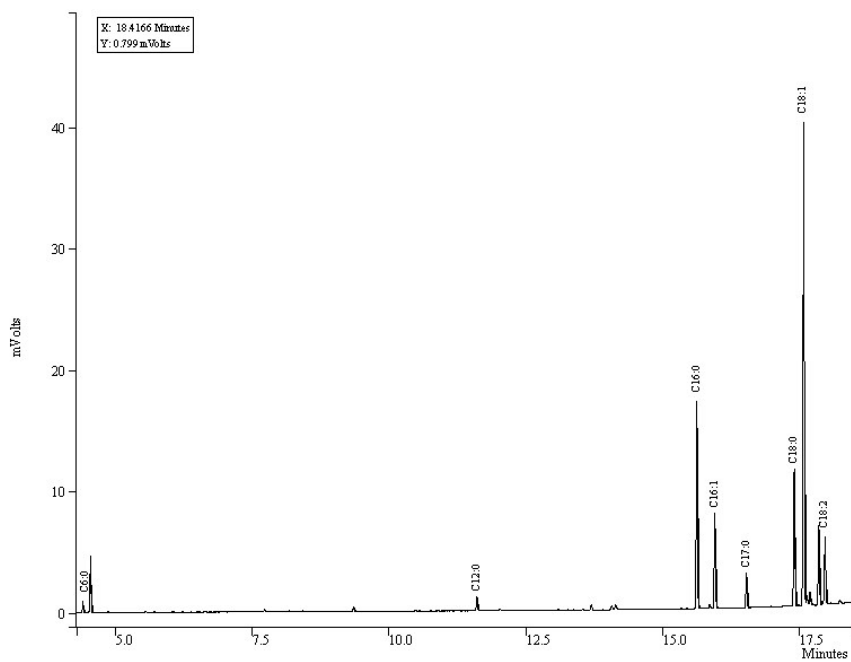

Supplement: c6ra23268j1.pdf [file c6ra23268j1.pdf]
